# Supplementary material for: Time-varying association between cigarette and ENDS use on incident hypertension among US adults: a prospective longitudinal study
Source: PubMed Central journal article supplement — BMJ Open. 2023 Apr 21;13(4):e062297. doi: 10.1136/bmjopen-2022-062297 (PMC10124226; doi:10.1136/bmjopen-2022-062297), 2023-04-21
Supplement: bmjopen-2022-062297supp001.pdf [file bmjopen-2022-062297supp001.pdf]

## Supplemental Material

Figure S1. Flowchart of Sample Selection for Analytic Sample, Self-Reported Hypertension Outcome

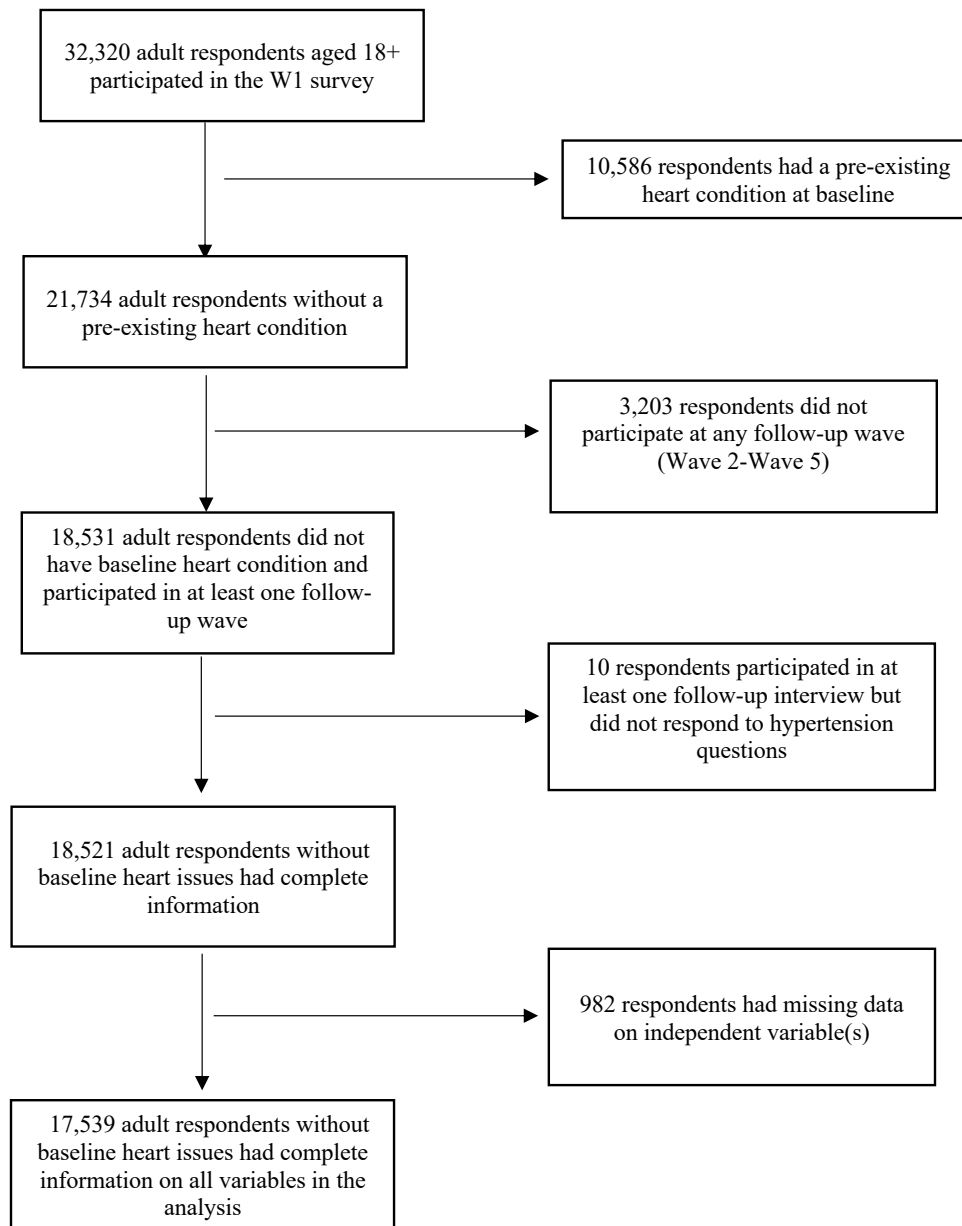

Table S1. Descriptive Statistics for Time-Varying Cigarette/ENDS Use, Established Adult Cigarette Smokers, Population Assessment of Tobacco &amp; Health Study

|                                         | Follow-Up Interview* |           |        |           |        |           |        |           |
|-----------------------------------------|----------------------|-----------|--------|-----------|--------|-----------|--------|-----------|
|                                         | Wave 1               |           | Wave 2 |           | Wave 3 |           | Wave 4 |           |
|                                         | %                    | 95% CI    | %      | 95% CI    | %      | 95% CI    | %      | 95% CI    |
| <i>Time varying cigarettes/ENDS use</i> |                      |           |        |           |        |           |        |           |
| Non use                                 | 79.2                 | 78.5-79.9 | 78.6   | 77.9-79.4 | 79     | 78.2-79.7 | 79.9   | 79.0-80.6 |
| Exclusive cigarette use                 | 18                   | 17.3-18.7 | 17.8   | 17.1-18.5 | 17.5   | 16.9-18.3 | 16.9   | 16.2-17.7 |
| Exclusive ENDS use                      | 1.1                  | 0.92-1.96 | 1.3    | 1.2-1.5   | 1.4    | 1.3-1.6   | 1.5    | 1.3-1.7   |
| Dual use                                | 1.7                  | 1.6-2.0   | 2.2    | 2.0-2.5   | 2.1    | 1.8-2.3   | 1.8    | 1.6-2.0   |

\*time-varying covariates were lagged by one wave to limit issues with reverse causation

Table S2. Analysis of Censored Cases, Self-reported hypertension

|                                          | Non-censored | Censored | P   |
|------------------------------------------|--------------|----------|-----|
| Age (mean)                               | 39.2         | 38       | **  |
| Sex                                      |              |          | *** |
| Female                                   | 55.5%        | 47.9%    |     |
| Male                                     | 44.5%        | 52.1%    |     |
| <i>Baseline cigarettes/ENDS exposure</i> |              |          | *** |
| Non use                                  | 80.1%        | 75.7%    |     |
| Exclusive cigarette use                  | 17.2%        | 20.9%    |     |
| Exclusive ENDS use                       | 1.1%         | 1.1%     |     |
| Dual use                                 | 1.6%         | 2.3%     |     |
| Race/Ethnicity                           |              |          | **  |
| NH White                                 | 62.7%        | 63.9%    |     |
| Hispanic                                 | 17.8%        | 16.9%    |     |
| NH Black                                 | 1150.0%      | 9.2%     |     |
| NH Asian                                 | 530.0%       | 7.4%     |     |
| NH Other                                 | 260.0%       | 2.6%     |     |
| Household Income                         |              |          | *** |
| <\$50,000                                | 56.5%        | 54.1%    |     |
| >\$50,000                                | 42.3%        | 39.9%    |     |
| missing                                  | 1.2%         | 6.0%     |     |
| Family history of heart attack           |              |          | NS  |
| No                                       | 71.7%        | 74.2%    |     |
| Yes                                      | 28.3%        | 25.8%    |     |
| Obesity (BMI >30)                        |              |          | **  |
| No                                       | 74.5%        | 78.7%    |     |
| Yes                                      | 25.5%        | 21.3%    |     |
| Diabetes diagnosis at baseline           |              |          | NS  |
| No                                       | 95.2%        | 95.6%    |     |
| Yes                                      | 4.8%         | 4.4%     |     |
| Binge drinking                           |              |          | *** |
| No                                       | 95.6%        | 94.9%    |     |
| Yes                                      | 4.4%         | 5.1%     |     |
| Former established smoker at baseline    |              |          | NS  |
| No                                       | 86.4%        | 87.7%    |     |
| Yes                                      | 13.6%        | 12.3%    |     |
| Pack-years at baseline (10 PY intervals) | 0.453        | 0.458    | NS  |

\*p&lt;0.05, \*\*p&lt;0.01, \*\*\*p&lt;0.001

Table S3. Discrete time survival analysis predicting incidence of hypertension among adults using longitudinal cohort 'all waves weights', Population Assessment of Tobacco and Health Study (Waves 1-5, 2013-2019)

|                                         | Unadjusted |           | Adjusted |           |
|-----------------------------------------|------------|-----------|----------|-----------|
|                                         | Hazard     | 95% CI    | Hazard   | 95% CI    |
| <i>Time varying cigarettes/ENDS use</i> |            |           |          |           |
| Non use                                 | REF        | REF       | REF      | REF       |
| Exclusive cigarette use                 | 1.35***    | 1.18-1.55 | 1.26**   | 1.07-1.49 |
| Exclusive ENDS use                      | 0.95       | .63-1.41  | 1.07     | .70-1.63  |
| Dual use                                | 1.11       | .81-1.51  | 1.25     | .89-1.75  |
| <i>Sociodemographic Risk factors</i>    |            |           |          |           |
| Age (mean)^                             | 1.03***    | 1.03-1.03 | 1.03***  | 1.02-1.03 |
| Sex (Male=1)                            | 1.36***    | 1.16-1.59 | 1.45***  | 1.23-1.70 |
| <i>Race/Ethnicity</i>                   |            |           |          |           |
| NH White                                | REF        | REF       | REF      | REF       |
| Hispanic                                | .78*       | .65-.94   | 0.92     | .76-1.10  |
| NH Black                                | 1.53***    | 1.31-1.79 | 1.65***  | 1.39-1.96 |
| NH Asian                                | .34***     | .21-.53   | .49**    | .30-.81   |
| NH Other                                | 1          | .69-1.47  | 1.07     | .72-1.59  |
| <i>Household Income</i>                 |            |           |          |           |
| <\$50,000                               | REF        | REF       | REF      | REF       |
| >\$50,000                               | .82*       | .70-.97   | 0.85     | .72-1.01  |
| missing                                 | 1          | .36-2.82  | 0.79     | .26-2.38  |
| <i>Baseline Risk Factors</i>            |            |           |          |           |
| Family History of heart attack          | 1.45***    | 1.22-1.71 | 1.29**   | 1.07-1.56 |
| Obesity (BMI>30)                        | 2.05***    | 1.77-2.36 | 1.81***  | 1.54-2.13 |
| Diabetes diagnosis                      | 2.61***    | 2.05-3.32 | 1.98***  | 1.54-2.55 |
| Binge Drinking                          | 1.19       | .93-1.54  | 1.19     | .91-1.55  |
| <i>Smoking History Variables</i>        |            |           |          |           |
| Former Established smoker               | 1.48**     | 1.19-1.83 | 1.09     | .86-1.38  |
| Pack years (intervals of 10)^           | 1.17***    | 1.12-1.21 | 1.04     | .99-1.09  |

Person N=11,437 ; Risk Period N =45,250

\*p<0.05, \*\*p<0.01, \*\*\*p<0.001

^cigarette pack-years were rescaled to intervals of 10 packyears

Table S4. Discrete time survival analysis predicting incidence of medicated hypertension among adults, Population Assessment of Tobacco and Health Study (Waves 1-5, 2013-2019)

|                                         | Medicated Hypertension |           |          |           |
|-----------------------------------------|------------------------|-----------|----------|-----------|
|                                         | Unadjusted             |           | Adjusted |           |
|                                         | Hazard                 | 95% CI    | Hazard   | 95% CI    |
| <i>Time varying cigarettes/ENDS use</i> |                        |           |          |           |
| Non use                                 | REF                    | REF       | REF      | REF       |
| Exclusive cigarette use                 | 1.29**                 | 1.10-1.51 | 1.25*    | 1.02-1.53 |
| Exclusive ENDS use                      | 0.62                   | .36-1.08  | 0.88     | .51-1.50  |
| Dual use                                | 0.85                   | .61-1.18  | 1.07     | .73-1.57  |
| <i>Sociodemographic Risk factors</i>    |                        |           |          |           |
| Age (mean)^                             | 1.04***                | 1.04-1.05 | 1.04***  | 1.04-1.05 |
| Sex (Male=1)                            | 1.23*                  | 1.04-1.47 | 1.23*    | 1.04-1.46 |
| <i>Race/Ethnicity</i>                   |                        |           |          |           |
| NH White                                | REF                    | REF       | REF      | REF       |
| Hispanic                                | .81*                   | .66-.99   | 1.03     | .83-1.28  |
| NH Black                                | 1.41***                | 1.17-1.70 | 1.71***  | 1.39-2.10 |
| NH Asian                                | .32*                   | .13-.77   | 0.52     | .21-2.10  |
| NH Other                                | 0.71                   | .44-1.15  | 0.81     | .52-1.26  |
| <i>Household Income</i>                 |                        |           |          |           |
| <\$50,000                               | REF                    | REF       | REF      | REF       |
| >\$50,000                               | .78**                  | .66-.92   | 0.85     | .72-1.03  |
| missing                                 | 0.78                   | .29-2.08  | 0.57     | .21-1.54  |
| <i>Baseline Risk Factors</i>            |                        |           |          |           |
| Family History of heart attack          | 1.34**                 | 1.10-1.62 | 1.12     | .91-1.38  |
| Obesity (BMI>30)                        | 1.86***                | 1.59-2.18 | 1.68***  | 1.41-2.00 |
| Diabetes diagnosis                      | 3.21***                | 2.51-4.11 | 2.12***  | 1.62-2.78 |
| Binge Drinking                          | 1.11                   | .84-1.47  | 1.27     | .95-1.68  |
| <i>Smoking History Variables</i>        |                        |           |          |           |
| Former Established smoker               | 1.42**                 | 1.14-1.77 | 0.88     | .68-1.13  |
| Pack years (intervals of 10)^           | 1.20***                | 1.15-1.24 | 1.06*    | 1.00-1.12 |

Person N=14,868 ; Risk Period N =52,818

\*p&lt;0.05, \*\*p&lt;0.01, \*\*\*p&lt;0.001

^tested for nonlinearity but the quadratic term was not significant

Table S5. Discrete time survival analysis predicting incidence of self-reported hypertension among adults with 'regular' cigarette/ENDS use (10+ days), Population Assessment of Tobacco and Health Study (Waves 1-5, 2013-2019)

|                                         | Unadjusted |           | Adjusted |            |
|-----------------------------------------|------------|-----------|----------|------------|
|                                         | Hazard     | 95% CI    | Hazard   | 95% CI     |
| <i>Time varying cigarettes/ENDS use</i> |            |           |          |            |
| Non use                                 | REF        | REF       | REF      | REF        |
| Exclusive cigarette use                 | 1.28***    | 1.15-1.42 | 1.18**   | 1.05, 1.33 |
| Exclusive ENDS use                      | 0.84       | .58-1.21  | 0.95     | 0.67, 1.35 |
| Dual use                                | 1          | .77-1.30  | 1.14     | 0.80, 1.64 |
| <i>Sociodemographic Risk factors</i>    |            |           |          |            |
| Age (mean)^                             | 1.03***    | 1.03-1.04 | 1.03***  | 1.03, 1.04 |
| Sex (Male=1)                            | 1.28**     | 1.11-1.48 | 1.33***  | 1.16, 1.54 |
| <i>Race/Ethnicity</i>                   |            |           |          |            |
| NH White                                | REF        | REF       | REF      | REF        |
| Hispanic                                | .83*       | .71-.98   | 0.99     | 0.84, 1.17 |
| NH Black                                | 1.44***    | 1.24-1.68 | 1.62***  | 1.39, 1.90 |
| NH Asian                                | .38***     | .23-.64   | 0.55*    | 0.33, 0.93 |
| NH Other                                | 1.03       | .73-1.44  | 1.06     | 0.76, 1.49 |
| <i>Household Income</i>                 |            |           |          |            |
| <\$50,000                               | REF        | REF       | REF      | REF        |
| >\$50,000                               | .80**      | .70-.92   | 0.83*    | 0.72, 0.96 |
| missing                                 | 0.67       | .32-1.39  | 0.58     | 0.27, 1.23 |
| <i>Baseline Risk Factors</i>            |            |           |          |            |
| Family History of heart attack          | 1.43***    | 1.24-1.66 | 1.27**   | 1.08, 1.49 |
| Obesity (BMI>30)                        | 1.89***    | 1.66-2.15 | 1.71***  | 1.50, 1.96 |
| Diabetes diagnosis                      | 2.48***    | 2.0-3.06  | 1.74***  | 1.37, 2.20 |
| Binge Drinking                          | 1.22       | .99-1.50  | 1.26*    | 1.02, 1.57 |
| <i>Smoking History Variables</i>        |            |           |          |            |
| Former Established smoker               | 1.42***    | 1.18-1.72 | 1.02     | 0.83, 1.27 |
| Pack years (intervals of 10)^           | 1.17***    | 1.13-1.21 | 1.04     | 0.99, 1.09 |

Notes: Person N=17,539 ; Risk Period N=59,367

\*p<0.05, \*\*p<0.01, \*\*\*p<0.001

^cigarette pack-years were rescaled to intervals of 10 packyears

Table S6. Discrete time survival analysis predicting incidence of self-reported hypertension with revised cigarette/ENDS exposure, Population Assessment of Tobacco and Health Study (Waves 1-5, 2013-2019)

|                                         | Unadjusted |            | Adjusted |            |
|-----------------------------------------|------------|------------|----------|------------|
|                                         | Hazard     | 95% CI     | Hazard   | 95% CI     |
| <i>Time varying cigarettes/ENDS use</i> |            |            |          |            |
| Never established use                   | REF        | REF        | REF      | REF        |
| Former cigarettes, no ENDS              | 1.43**     | 1.17, 1.75 | 0.97     | 0.78, 1.21 |
| Current cigarettes, no ENDS             | 1.38***    | 1.22, 1.56 | 1.20*    | 1.04, 1.38 |
| Former cigarettes, current ENDS         | 1          | 0.64, 1.55 | 1.01     | 0.64, 1.60 |
| Current cigarettes and ENDS             | 1.07       | 0.80, 1.41 | 1.13     | 0.84, 1.52 |
| Exclusive ENDS                          | 0.64       | 0.31, 1.32 | 0.86     | 0.41, 1.82 |
| <i>Sociodemographic Risk factors</i>    |            |            |          |            |
| Age (mean)^                             | 1.03***    | 1.03-1.04  | 1.03***  | 1.03, 1.04 |
| Sex (Male=1)                            | 1.28**     | 1.11-1.48  | 1.33***  | 1.15, 1.53 |
| <i>Race/Ethnicity</i>                   |            |            |          |            |
| NH White                                | REF        | REF        | REF      | REF        |
| Hispanic                                | .83*       | .71-.98    | 1        | 0.85, 1.17 |
| NH Black                                | 1.44***    | 1.24-1.68  | 1.61***  | 1.37, 1.89 |
| NH Asian                                | .38***     | .23-.64    | 0.56*    | 0.33, 0.94 |
| NH Other                                | 1.03       | .73-1.44   | 1.05     | 0.75, 1.47 |
| <i>Household Income</i>                 |            |            |          |            |
| <\$50,000                               | REF        | REF        | REF      | REF        |
| >\$50,000                               | .80**      | .70-.92    | 0.83*    | 0.72, 0.96 |
| missing                                 | 0.67       | .32-1.39   | 0.58     | 0.27, 1.24 |
| <i>Baseline Risk Factors</i>            |            |            |          |            |
| Family History of heart attack          | 1.43***    | 1.24-1.66  | 1.28**   | 1.09, 1.49 |
| Obesity (BMI>30)                        | 1.89***    | 1.66-2.15  | 1.72***  | 1.50, 1.98 |
| Diabetes diagnosis                      | 2.48***    | 2.0-3.06   | 1.76***  | 1.39, 2.22 |
| Binge Drinking                          | 1.22       | .99-1.50   | 1.26*    | 1.01, 1.57 |
| <i>Smoking History Variables</i>        |            |            |          |            |
| Pack years (intervals of 10)^           | 1.17***    | 1.13-1.21  | 1.04     | 0.99, 1.09 |

Notes: Person N=17,539 ; Risk Period N=59,367

\*p&lt;0.05, \*\*p&lt;0.01, \*\*\*p&lt;0.001

^cigarette pack-years were rescaled to intervals of 10 packyears

Table S7. Discrete time survival analysis predicting incidence of self-reported hypertension among never established cigarette smokers, Population Assessment of Tobacco and Health Study (Waves 1-5, 2013-2019)

|                                      | Unadjusted |            | Adjusted |            |
|--------------------------------------|------------|------------|----------|------------|
|                                      | Hazard     | 95% CI     | Hazard   | 95% CI     |
| <i>Time varying ENDS use</i>         | 0.56       | 0.28, 1.13 | 0.75     | 0.37, 1.52 |
| <i>Sociodemographic Risk factors</i> |            |            |          |            |
| Age (mean)^                          | 1.04***    | 1.03, 1.04 | 1.04***  | 1.03, 1.04 |
| Sex (Male=1)                         | 1.25*      | 1.03, 1.52 | 1.31**   | 1.07, 1.60 |
| Race/Ethnicity                       |            |            |          |            |
| NH White                             | REF        | REF        | REF      | REF        |
| Hispanic                             | 0.84       | 0.67, 1.05 | 0.89     | 0.69, 1.14 |
| NH Black                             | 1.42**     | 1.17, 1.72 | 1.56***  | 1.25, 1.93 |
| NH Asian                             | 0.40**     | 0.21, 0.77 | 0.54     | 0.28, 1.05 |
| NH Other                             | 1.25       | 0.80, 1.97 | 1.34     | 0.81, 2.19 |
| Household Income                     |            |            |          |            |
| <\$50,000                            | REF        | REF        | REF      | REF        |
| >\$50,000                            | 0.75**     | 0.62, 0.90 | 0.74**   | 0.60, 0.90 |
| missing                              | 0.71       | 0.27, 1.87 | 0.53     | 0.19, 1.43 |
| <i>Baseline Risk Factors</i>         |            |            |          |            |
| Family History of heart attack       | 1.41**     | 1.16, 1.71 | 1.23     | 0.99, 1.52 |
| Obesity (BMI>30)                     | 2.09***    | 1.72, 2.53 | 1.80***  | 1.47, 2.20 |
| Diabetes diagnosis                   | 2.59***    | 1.95, 3.45 | 1.71**   | 1.23, 2.36 |
| Binge Drinking                       | 1.09       | 0.71, 1.68 | 1.4      | 0.89, 2.18 |

Notes: Person N=9478 ; Risk Period N=32,579

\*p<0.05, \*\*p<0.01, \*\*\*p<0.001
